- siveness: A "gray zone" approach. *ANESTHESIOLOGY* 2011; 115:231–41
2. De Hert SG: Assessment of Fluid Responsiveness Insights in a "gray zone." *ANESTHESIOLOGY* 2011; 115:229–30
  3. Marik PE, Cavallazzi R, Vasu T, Hirani A: Dynamic changes in arterial waveform derived variables and fluid responsiveness in mechanically ventilated patients: A systematic review of the literature. *Crit Care Med* 2009; 37:2642–7
  4. Pinsky MR: Hemodynamic evaluation and monitoring in the ICU. *Chest* 2007; 132:2020–9
  5. Erlanger J, Hooker D: An experimental study of blood pressure and pulse pressure in man. *Johns Hopkins Hospital Records* 1904; 12:145–378
  6. Pinsky M. (2006). Protocolized cardiovascular management based on ventricular-arterial coupling. In: Jean-Louis Vincent (Ed.), *Functional Hemodynamic Monitoring, Update In Intensive Care Medicine* (pp. 381–95). Springer-Verlag Berlin Heidelberg
  7. Mailloux PT, McGee WT, Nathanson B: Hemodynamic and delta blood volume relationship during continuous renal replacement therapy. *Abstracts* 2009; 136:50S–e
  8. Mena GE, Raghunathan K, McGee WT: Intraoperative monitoring. In: *Principles of Practice of Anesthesia for Thoracic Surgery*. Springer Science and Business Media, LLC, New York. 2011, pp. 265–76

(Accepted for publication December 6, 2011.)

## How Accurate Is Pulse Pressure Variation as a Predictor of Fluid Responsiveness?

### To the Editor:

We read with interest the Perioperative Medicine article "Assessing the Diagnostic Accuracy of Pulse Pressure Variations for the Prediction of Fluid Responsiveness: A 'Gray Zone' Approach" by Cannesson *et al.*<sup>1</sup> and its accompanying editorial: "Insights in a 'Gray Zone.'"<sup>2</sup>

Fluid responsiveness is based on the proposition that an increase in cardiac output by at least a certain amount may be achieved by a specific bolus of a specified fluid, whereas nonresponders will require other means to increase the cardiac output. There are a number of limitations with this definition. The type of fluid used will have an impact on the amount of expansion of the intravascular compartment. In the study, iso-oncotic colloid was used, but even the volume effect of this will depend on the volume status of the patient (context sensitive).<sup>3</sup> Associated with this is the fact that the endothelial glycocalyx is degraded by the release of cytokines during surgery or the release of atrial natriuretic peptide caused by hypervolemia.<sup>4</sup> The minimally required increase in cardiac output will have a direct impact on the size of the "gray zone," as was demonstrated in the study, and the utility of bolus fluid therapy has been questioned following the publication of the Feast trial.<sup>5</sup> Fluid responsiveness assessed by pulse pressure variation cannot distinguish between an increase in variation caused by fluid loss from that caused by vasodilation.

The concept of pulse pressure variation is closely related to the respiratory cycle and changes in pleural pressure. Pleural pressure changes are impacted by either smaller tidal volumes or poor lung compliance. As an extreme example, high-

frequency oscillation ventilation results in minimal pulse pressure variation irrespective of the volume status of the patient. For patients within the "gray zone," increasing the tidal volume may increase the pulse pressure variation indicating fluid responsiveness.

Although it may be reasonable to give a fluid bolus to patients above the upper limit of the gray zone, a knowledge of the cardiac output is extremely useful to make an informed decision on treatment for patients in or below the gray zone and avoid overloading the interstitial space with fluids. Lichtenstein<sup>6</sup> has suggested that transthoracic ultrasound of the lungs may be useful in the early detection of interstitial syndrome (because of fluid overload, cardiac failure, or increased capillary permeability) by observing a change from A-line predominance to B-line predominance.

There are several limitations of the study that may make it difficult to apply to a more general population, including the male predominance in the study (75%) and the selection of mainly cardiac or abdominal aortic surgery (88%) with only 22% being general surgery.

**Andrew Verniquet, M.D., F.R.C.P.C.,\* Rafid Kakel, M.D.**

\*James Paton Memorial Hospital-Central Health, Gander, Newfoundland and Labrador, Canada. andrewverniquet@hotmail.com

## References

1. Cannesson M, Le Manach Y, Hofer CK, Goarin JP, Lehot JJ, Vallet B, Tavernier B: Assessing the diagnostic accuracy of pulse pressure variations for the prediction of fluid responsiveness. A "gray zone" approach. *ANESTHESIOLOGY* 2011; 115:231–41
2. De Hert SG: Assessment of fluid responsiveness: Insights in a "gray zone." *ANESTHESIOLOGY* 2011; 115:229–30
3. Jacob M, Chappell D, Rehm M: Clinical update: Perioperative fluid management. *Lancet* 2007; 369:1984–6
4. Chappell D, Jacob M, Hofmann-Kiefer K, Conzen P, Rehm M: A rational approach to perioperative fluid management. *ANESTHESIOLOGY* 2008; 109:723–40
5. Myburgh JA: Fluid resuscitation in acute illness—time to reappraise the basics. *N Engl J Med* 2011; 364:2543–4
6. Lichtenstein DA, Mezière G, Lagoueyte JF, Biderman P, Goldstein I, Gepner A: A-lines and B-lines: Lung ultrasound as a bedside tool for predicting pulmonary artery occlusion pressure in the critically ill. *Chest* 2009; 136:1014–20

(Accepted for publication December 6, 2011.)

## The "Gray Zone Approach": Assessing the Accuracy of Pulse Pressure Variation without Considering the Prevalence?

### To the Editor:

We read with great interest the article of Cannesson *et al.*<sup>1</sup> regarding the accuracy of pulse pressure variation monitoring to predict fluid responsiveness. We applaud the introduction of "misclassification cost" as a novel approach to evaluate the clinical utility of a widely advocated monitoring technique.
